# Supplementary material
Source: Springer Nature journal article supplement (https://www.springermedizin.de/resource/supplementary/12970_2007_47_MOESM8_ESM.pdf/9594242)

## Methandrostenedolone

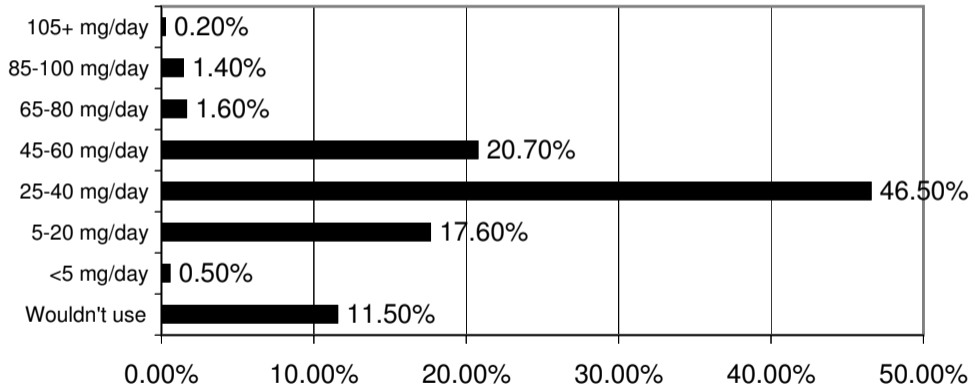

Supplement: MOESM8 [file 9594242]
